# Supplementary material
Source: publisher site journal article supplement (http://www.degruyter.com/publication/journal_key/CHEM/downloadAsset/CHEM_CFP_The%207th%20International%20Conference%20on%20Applied%20Biochemistry%20and%20Biotechnology.pdf)
Supplement: Supplementary file 1 [file CHEM_CFP_The%207th%20International%20Conference%20on%20Applied%20Biochemistry%20and%20Biotechnology.pdf]

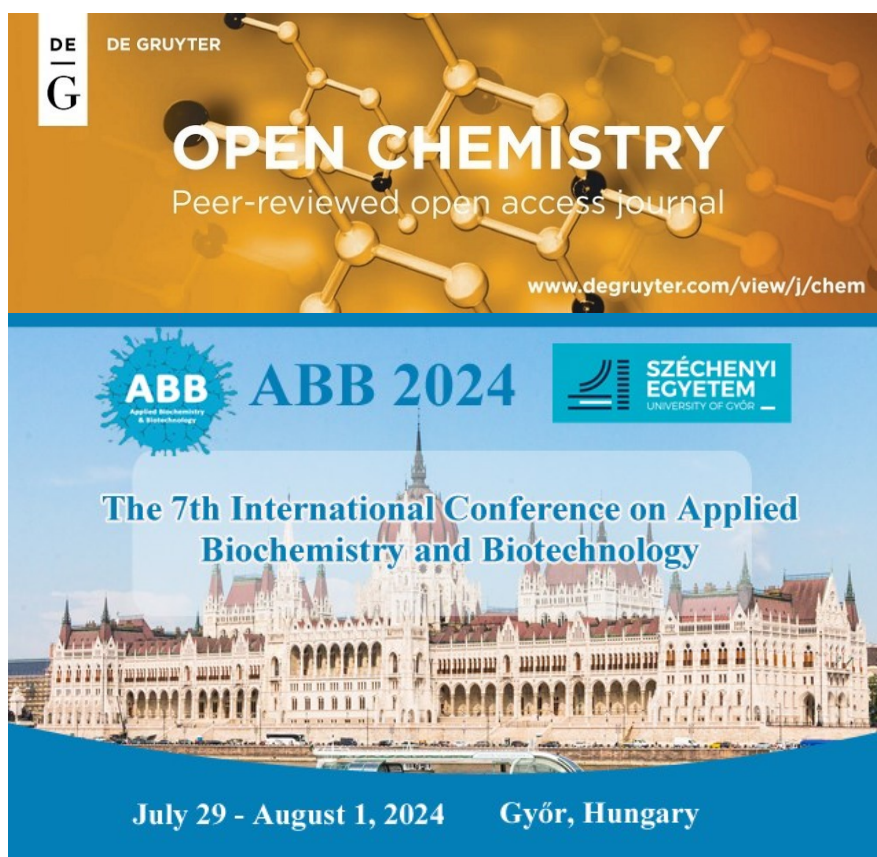

## The 7th International Conference on Applied Biochemistry and Biotechnology (ABB 2024)

29<sup>th</sup> July – 1<sup>st</sup> August, 2024, Győr, Hungary

### DESCRIPTION:

As an annual conference held successfully in Hangzhou, Macao and Online (ABB 2020, ABB 2021, ABB 2022) and in Macao in the past 6 years, the 7th International Conference on Applied Biochemistry and Biotechnology (ABB 2024) will be a valuable and important platform for inspiring international and interdisciplinary exchange at the forefront of applied biochemistry and biotechnology. The series of plenary speech, oral and poster presentations, workshops, discussions, and networking events will keep participants engaged in learning and making new connections at ABB 2024.

**Submission deadline: 30.09.2024**

### HOW TO SUBMIT

The authors are kindly invited to register at our paper [processing system](#) and submit their contribution.

**We offer a discount on publication on this special issue.**

All manuscripts will undergo the standard peer-review process (single-blind, at least two independent reviewers) and will be treated in the same way as other regular articles (indexing, abstracting, immediate publication, etc.). Instructions for authors are available [here](#).

More information about the conference, such as deadlines and preliminary schedule, can be accessed at <http://www.abbconf.org/> or by email [info@abbconf.org](mailto:info@abbconf.org) (Conference Office)

In case of any questions please contact Open Chemistry Managing Editor:

Małgorzata Komadowska ([openchemistry@degruyter.com](mailto:openchemistry@degruyter.com)).

<https://www.degruyter.com/chem>
